# Supplementary material
Source: Springer Nature journal article supplement (https://www.springermedizin.de/resource/supplementary/12916_2013_908_MOESM5_ESM.pdf/9598802)

Partial chance-corrected concordance

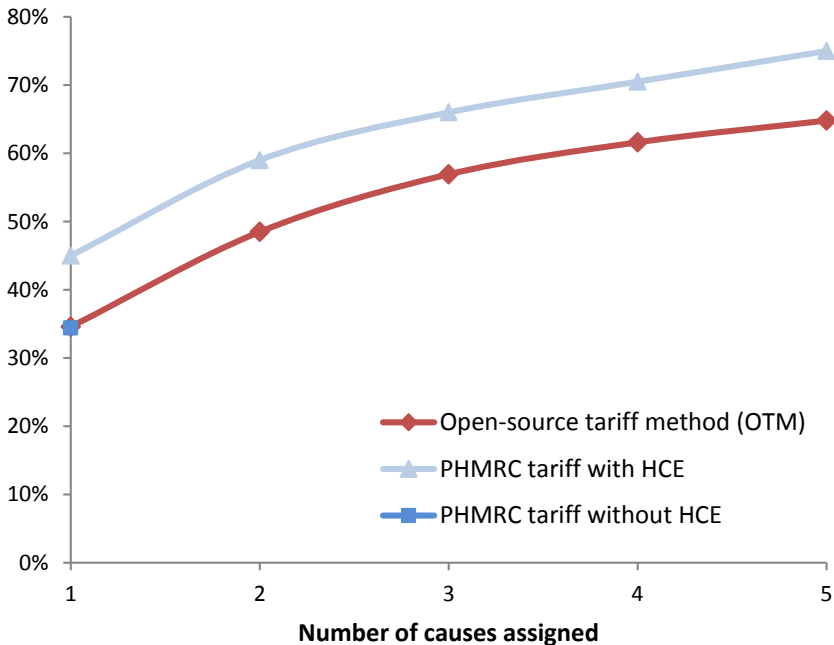

Supplement: MOESM5 [file 9598802]
